# Supplementary material for: Impact of First Meal Size during Prolonged Sitting on Postprandial Glycaemia in Individuals with Prediabetes: A Randomised, Crossover Study
Source: MDPI journal article supplement (doi:10.3390/nu10060733), 2018-06-06
Supplement: s1 [file s1]

**Table S1.** Meal composition and nutritional values for a 10900 kJ example diet for each condition.

|                         | HE-BF         |                |                  |               |             |                |              | LE-BF  |                |                  |               |             |                |              |
|-------------------------|---------------|----------------|------------------|---------------|-------------|----------------|--------------|--------|----------------|------------------|---------------|-------------|----------------|--------------|
|                         | Weight<br>(g) | Energy<br>(kJ) | Total<br>CHO (g) | Sugars<br>(g) | Fat*<br>(g) | Protein<br>(g) | Fibre<br>(g) | Weight | Energy<br>(kJ) | Total<br>CHO (g) | Sugars<br>(g) | Fat*<br>(g) | Protein<br>(g) | Fibre<br>(g) |
| <b>Breakfast</b>        |               |                |                  |               |             |                |              |        |                |                  |               |             |                |              |
| White bread             | 281           | 2708           | 111.9            | 6.7           | 5.9         | 22.5           | 18.5         | 113    | 1083           | 44.8             | 2.7           | 2.4         | 9.0            | 7.5          |
| Sliced ham              | 94            | 438            | 1.9              | 0.8           | 2.3         | 15.9           | 1.7          | 38     | 175            | 0.8              | 0.3           | 0.9         | 6.4            | 0.7          |
| Butter                  | 9             | 263            | 0.0              | 0.0           | 7.0         | 0              | 0.0          | 6      | 188            | 0                | 0             | 5.0         | 0              | 0            |
| Cheddar cheese          | 63            | 1044           | 0.1              | 0.1           | 21.3        | 15.0           | 0.0          | 25     | 418            | 0                | 0             | 8.5         | 6.0            | 0            |
| Yoghurt                 | 123           | 478            | 18.0             | 18.0          | 2.0         | 6.0            | 0.1          | 88     | 341            | 12.0             | 12.8          | 2.0         | 4.4            | 0.1          |
| Orange Juice            | 240           | 408            | 21.6             | 21.6          | 0           | 1.4            | 0.5          | 150    | 255            | 13.5             | 9.5           | 0           | 0.9            | 0.3          |
| <b>Breakfast Total</b>  |               | <b>4916</b>    | <b>153.5</b>     | <b>47.2</b>   | <b>38.5</b> | <b>61.0</b>    | <b>20.8</b>  |        | <b>2277</b>    | <b>71.1</b>      | <b>25.3</b>   | <b>18.8</b> | <b>26.7</b>    | <b>8.6</b>   |
| <b>B/fast EI (%)</b>    |               |                | <b>46%</b>       |               | <b>27%</b>  | <b>20%</b>     |              |        |                | <b>47%</b>       |               | <b>28%</b>  | <b>19%</b>     |              |
| <b>Lunch</b>            |               |                |                  |               |             |                |              |        |                |                  |               |             |                |              |
| English muffins         | 106           | 878            | 37.2             | 1.8           | 2.2         | 7.5            | 3.3          | 106    | 878            | 37.2             | 1.8           | 2.2         | 7.5            | 3.3          |
| Baked beans             | 238           | 855            | 30.6             | 8.4           | 1.3         | 11.9           | 12.1         | 238    | 855            | 30.6             | 8.4           | 1.3         | 11.9           | 12.1         |
| Butter                  | 9             | 263            | 0                | 0             | 7.0         | 0              | 0            | 9      | 263            | 0.0              | 0             | 7.0         | 0              | 0            |
| Cheddar cheese          | 35            | 585            | 0                | 0             | 11.9        | 8.4            | 0            | 35     | 585            | 0                | 0             | 11.9        | 8.4            | 0            |
| Yoghurt                 | 113           | 439            | 15.5             | 15.5          | 2.1         | 5.6            | 0.1          | 113    | 439            | 15.5             | 15.5          | 2.1         | 5.6            | 0.1          |
| Tinned fruit (in juice) | 156           | 336            | 17.2             | 17.2          | 0.2         | 1.2            | 2.6          | 156    | 336            | 17.2             | 17.2          | 0.2         | 1.2            | 2.6          |
| <b>Lunch Total</b>      |               | <b>3118</b>    | <b>100.5</b>     | <b>42.9</b>   | <b>24.7</b> | <b>34.6</b>    | <b>18.1</b>  |        | <b>3118</b>    | <b>100.5</b>     | <b>42.9</b>   | <b>24.7</b> | <b>34.6</b>    | <b>18.1</b>  |
| <b>Lunch EI (%)</b>     |               |                | <b>48%</b>       |               | <b>27%</b>  | <b>18%</b>     |              |        |                | <b>48%</b>       |               | <b>27%</b>  | <b>18%</b>     |              |
| <b>Dinner</b>           |               |                |                  |               |             |                |              |        |                |                  |               |             |                |              |
| White rice              | 125           | 1049           | 48.8             | 0.1           | 3.8         | 3.8            | 1.2          | 288    | 2412           | 112.1            | 0.3           | 8.6         | 8.6            | 2.9          |
| Tuna (in olive oil)     | 63            | 576            | 0                | 0             | 8.6         | 17.4           | 0            | 156    | 1441           | 0.0              | 0             | 21.4        | 43.4           | 0            |
| Steamed vegetables      | 75            | 92             | 2.1              | 2.1           | 0.2         | 2.0            | 2.6          | 150    | 183            | 4.2              | 4.2           | 0.3         | 3.9            | 5.3          |
| Sweet chili sauce       | 13            | 59             | 2.5              | 2.0           | 0.3         | 0.1            | 0.6          | 25     | 118            | 4.7              | 3.8           | 0.7         | 0.2            | 1.1          |
| Butter                  | 5             | 150            | 0                | 0.0           | 4.0         | 0              | 0.0          | 13     | 375            | 0                | 0.0           | 10.1        | 0.1            | 0.0          |
| Yoghurt                 | 63            | 244            | 8.6              | 8.6           | 1.2         | 3.1            | 0.1          | 188    | 731            | 25.9             | 25.9          | 3.6         | 9.4            | 0.2          |
| Orange juice            | 75            | 128            | 7                | 7             | 0           | 0              | 0.2          | 240    | 408            | 21.6             | 21.6          | 0           | 1.4            | 0.5          |
| <b>Dinner total</b>     |               | <b>2219</b>    | <b>68.6</b>      | <b>24.7</b>   | <b>18.1</b> | <b>26.4</b>    | <b>4.7</b>   |        | <b>5487</b>    | <b>168.5</b>     | <b>65.2</b>   | <b>44.6</b> | <b>67.1</b>    | <b>10.0</b>  |
| <b>Dinner EI (%)</b>    |               |                | <b>48%</b>       |               | <b>29%</b>  | <b>20%</b>     |              |        |                | <b>48%</b>       |               | <b>29%</b>  | <b>20%</b>     |              |
| <b>Daily Total</b>      |               | <b>10989</b>   | <b>321.6</b>     | <b>114.8</b>  | <b>81.3</b> | <b>121.8</b>   | <b>43.3</b>  |        | <b>11482</b>   | <b>340.3</b>     | <b>133.4</b>  | <b>88.2</b> | <b>127.9</b>   | <b>36.5</b>  |

Key: CHO, carbohydrate; HE-BF, high energy breakfast; LE-BF, low energy breakfast. \*Fat breakdown for HE-BF: 51%:22%:26%, LE-BF: 58%:15%:27% (Saturated : Monounsaturated : Polyunsaturated; respectively)
